# Supplementary material for: Broadband emitting phosphor Sr6Sc2Al4O15:Cr3+ for near-infrared LEDs
Source: Royal Society of Chemistry journal article supplement (doi:10.1039/d3tc01241g), 2023-01-01
Supplement: d3tc01241g1.pdf [file d3tc01241g1.pdf]

## Supporting information

### Broadband emitting phosphor $\text{Sr}_6\text{Sc}_2\text{Al}_4\text{O}_{15}:\text{Cr}^{3+}$ for near-infrared LEDs

*Jinyi Wang, Xudong Wang, Chenjie Zhang, Xinyu Zhang, Tianliang Zhou\* and Rong-Jun Xie\**

Fujian Key Laboratory of Surface and Interface Engineering for High Performance Materials,  
College of Materials, Xiamen University, Xiamen 361005, P. R. China

#### Corresponding Authors

\*E-mail: bible2@163.com (T.Z.).

\*E-mail: rjxie@xmu.edu.cn (R.-J.X.).

**Table S1.** Excitation and emission peak wavelengths of some NIR phosphors.

| Phosphor                                                                          | $\lambda_{\text{ex}}$ (nm) | $\lambda_{\text{em}}$ (nm) | Spectral profile | Ref. |
|-----------------------------------------------------------------------------------|----------------------------|----------------------------|------------------|------|
| MgGeO <sub>3</sub> :Pr <sup>3+</sup>                                              | 254                        | 625                        | Multi-narrowband | 1    |
| K <sub>3</sub> LuSi <sub>2</sub> O <sub>7</sub> :Eu <sup>2+</sup>                 | 460                        | 740                        | Broadband        | 2    |
| Sr <sub>3</sub> Li <sub>4</sub> Si <sub>2</sub> N <sub>6</sub> :Eu <sup>2+</sup>  | 450                        | 800                        | Broadband        | 3    |
| Lu <sub>3</sub> Sc <sub>2</sub> Ga <sub>3</sub> O <sub>12</sub> :Yb <sup>3+</sup> | 850                        | 976                        | Multi-narrowband | 4    |
| La <sub>3</sub> Si <sub>6</sub> N <sub>11</sub> :Yb <sup>3+</sup>                 | 365                        | 983                        | Narrowband       | 5    |
| LaSrGaO <sub>4</sub> :Nd <sup>3+</sup>                                            | 808                        | 1076                       | Multi-narrowband | 6    |
| Y <sub>2</sub> Ti <sub>2</sub> O <sub>7</sub> :Bi <sup>3+</sup>                   | 391                        | 744                        | Broadband        | 7    |
| Cs <sub>2</sub> ZnCl <sub>4</sub> :Sb <sup>3+</sup>                               | 316                        | 745                        | Broadband        | 8    |
| FAPbI <sub>3</sub> :Sn <sup>2+</sup>                                              | 510                        | 784                        | Narrowband       | 9    |
| MgAl <sub>2</sub> O <sub>4</sub> :Mn <sup>4+</sup>                                | 440                        | 651                        | Broadband        | 10   |
| NaAlP <sub>2</sub> O <sub>7</sub> :Cr <sup>3+</sup>                               | 450                        | 790                        | Broadband        | 11   |
| MgAl <sub>2</sub> O <sub>4</sub> :Mn <sup>2+</sup>                                | 450                        | 825                        | Broadband        | 12   |
| CaMgGe <sub>2</sub> O <sub>6</sub> :Cr <sup>3+</sup>                              | 450                        | 845                        | Broadband        | 13   |
| CaMgSi <sub>2</sub> O <sub>6</sub> :Cr <sup>3+</sup>                              | 455                        | 845                        | Broadband        | 14   |
| LiGaP <sub>2</sub> O <sub>7</sub> :Cr <sup>3+</sup>                               | 452                        | 846                        | Broadband        | 15   |
| NaInP <sub>2</sub> O <sub>7</sub> :Cr <sup>3+</sup>                               | 460                        | 870                        | Broadband        | 16   |
| LiInGe <sub>2</sub> O <sub>6</sub> :Cr <sup>3+</sup>                              | 460                        | 880                        | Broadband        | 17   |
| Sr <sub>2</sub> InSbO <sub>6</sub> :Fe <sup>3+</sup>                              | 340                        | 885                        | Broadband        | 18   |
| NaScGe <sub>2</sub> O <sub>6</sub> :Cr <sup>3+</sup>                              | 490                        | 895                        | Broadband        | 19   |
| CaScAlSiO <sub>6</sub> :Cr <sup>3+</sup>                                          | 460                        | 950                        | Broadband        | 20   |
| ZnGa <sub>2</sub> O <sub>4</sub> :Ni <sup>2+</sup>                                | 260                        | 1240                       | Broadband        | 21   |

**Table S2.** Crystallographic data of SSA:xCr<sup>3+</sup> (x = 0.008, 0.08).

| Formula                        | SSA:0.008Cr <sup>3+</sup> | SSA:0.08Cr <sup>3+</sup> |
|--------------------------------|---------------------------|--------------------------|
| Crystal system                 | monoclinic                | monoclinic               |
| Space group                    | C 2                       | C 2                      |
| a (Å)                          | 17.2395                   | 17.2370                  |
| b (Å)                          | 5.6304                    | 5.6293                   |
| c (Å)                          | 7.5588                    | 7.5549                   |
| $\alpha, \beta, \gamma$ (deg.) | 90, 91.28, 90             | 90, 91.25, 90            |
| Rwp (%)                        | 3.62                      | 3.72                     |
| Rp (%)                         | 2.81                      | 2.87                     |
| $\chi^2$                       | 1.64                      | 1.76                     |

**Table S3.** Atomic coordinates and isotropic displacement parameters of SSA.

| Atom | x         | y         | z         | Occupancy |
|------|-----------|-----------|-----------|-----------|
| Sc1  | 0.3448(6) | 0.4815(3) | 0.7557(3) | 1         |
| Sr1  | 0.1719(6) | 0.4850(7) | 0.5027(1) | 1         |
| Sr2  | 0.1626(5) | 0.4695(6) | 0.9714(5) | 1         |

|     |           |           |           |     |
|-----|-----------|-----------|-----------|-----|
| Sr3 | 0         | 0.0137(8) | 0         | 0.5 |
| Sr4 | 0         | 0.0610(4) | 0.5       | 0.5 |
| Al1 | 0.3115(7) | 0.4793(8) | 0.2457(6) | 1   |
| Al2 | 0.0165(3) | 0.5065(5) | 0.2249(5) | 1   |

**Table S4.** Atomic coordinates and isotropic displacement parameters of SSA:0.008Cr<sup>3+</sup>.

| Atom | x         | y         | z         | Occupancy |
|------|-----------|-----------|-----------|-----------|
| Sc1  | 0.3446(4) | 0.5098(3) | 0.7546(9) | 0.996     |
| Cr1  | 0.3446(4) | 0.5098(3) | 0.7546(9) | 0.004     |
| Sr1  | 0.1717(7) | 0.5044(1) | 0.5000(5) | 1         |
| Sr2  | 0.1618(4) | 0.4866(2) | 0.9704(5) | 1         |
| Sr3  | 0         | 0.0311(4) | 0         | 0.5       |
| Sr4  | 0         | 0.0871(1) | 0.5       | 0.5       |
| Al1  | 0.3112(6) | 0.4862(2) | 0.2434(9) | 1         |
| Al2  | 0.0153(4) | 0.5350(9) | 0.2273(7) | 1         |

**Table S5.** Atomic coordinates and isotropic displacement parameters of SSA:0.08Cr<sup>3+</sup>.

| Atom | x         | y         | z         | Occupancy |
|------|-----------|-----------|-----------|-----------|
| Sc1  | 0.3441(5) | 0.5069(3) | 0.7561(6) | 0.96      |
| Cr1  | 0.3441(5) | 0.5069(3) | 0.7561(6) | 0.04      |
| Sr1  | 0.1713(6) | 0.5056(6) | 0.5017(1) | 1         |
| Sr2  | 0.1624(4) | 0.4904(8) | 0.9709(2) | 1         |
| Sr3  | 0         | 0.0329(8) | 0         | 0.5       |
| Sr4  | 0         | 0.0857(9) | 0.5       | 0.5       |
| Al1  | 0.3114(5) | 0.4879(1) | 0.2422(7) | 1         |
| Al2  | 0.0164(1) | 0.5370(5) | 0.2299(5) | 1         |

**Table S6.** ESR resonance signals of some Cr<sup>3+</sup>-doped NIR phosphors.

| Phosphors                                                             | Resonance signals              |                                          | Ref. |
|-----------------------------------------------------------------------|--------------------------------|------------------------------------------|------|
|                                                                       | Isolated Cr <sup>3+</sup> ions | Cr <sup>3+</sup> -Cr <sup>3+</sup> pairs |      |
| LiScGeO <sub>4</sub>                                                  | $g = 4.22$                     | $g = 1.97$                               | 22   |
| Gd <sub>2.4</sub> Lu <sub>0.6</sub> Ga <sub>4</sub> AlO <sub>12</sub> | $g = 4.22$                     | $g = 1.97$                               | 23   |
| Ga <sub>4</sub> GeO <sub>8</sub>                                      | $g = 4.89$                     | $g = 2.02$                               | 24   |
| La <sub>2</sub> MgHfO <sub>6</sub>                                    | /                              | $g = 1.99$                               | 25   |
| La <sub>2</sub> MgZrO <sub>6</sub>                                    | $g = 4.22$                     | $g = 1.97$                               | 26   |
| GdAl <sub>3</sub> (BO <sub>3</sub> ) <sub>4</sub>                     | /                              | $g = 1.98$                               | 27   |
| La <sub>3</sub> Ga <sub>5.5</sub> Nb <sub>0.5</sub> O <sub>14</sub>   | $g = 3.80$                     | $g = 1.94$                               | 28   |
| LiScGeO <sub>4</sub>                                                  | $g = 3.878$                    | $g = 2.007$                              | 29   |
| Lu <sub>2</sub> CaMg <sub>2</sub> Si <sub>3</sub> O <sub>12</sub>     | $g = 4.32$                     | $g = 1.98$                               | 30   |

Table S6 lists the  $g$  value of some Cr doped NIR phosphors. The average  $g$  value was calculated

to be 4.22 ( $\sigma^2 = 0.11$ ) and 1.98 ( $\sigma^2 = 4.81 \times 10^{-4}$ ) (representing the isolated  $\text{Cr}^{3+}$  ions and  $\text{Cr}^{3+}$ - $\text{Cr}^{3+}$  pairs, respectively). Apparently, the  $g$  values of  $\text{SSA}:0.008\text{Cr}^{3+}$  are close to the average calculated  $g$  values.

**Table S7.** Binding energy of  $\text{Cr}^{3+}$  of some NIR phosphors.

| Phosphors                                                  | Binding energy (eV)                                        | Ref. |
|------------------------------------------------------------|------------------------------------------------------------|------|
| $\text{SnO}_2$                                             | Cr-2p <sub>1/2</sub> (586.7); Cr-2p <sub>3/2</sub> (577.0) | 31   |
| $\text{Sr}_2\text{P}_2\text{O}_7$                          | Cr-2p <sub>3/2</sub> (577.0)                               | 32   |
| $\text{La}_2\text{MgHfO}_6$                                | Cr-2p <sub>1/2</sub> (586.3); Cr-2p <sub>3/2</sub> (576.3) | 25   |
| $\text{K}_2\text{Ga}_2\text{Sn}_6\text{O}_{16}$            | Cr-2p <sub>3/2</sub> (576.01)                              | 33   |
| $\text{Mg}_7\text{Ga}_2\text{GeO}_{12}$                    | Cr-2p <sub>1/2</sub> (582.5)                               | 34   |
| $\text{CaLu}_2\text{Mg}_2\text{Si}_3\text{O}_{12}$         | Cr-2p <sub>3/2</sub> (577.0)                               | 35   |
| $\text{Ga}_4\text{GeO}_8$                                  | Cr-2p <sub>3/2</sub> (576.0)                               | 24   |
| $\text{Gd}_{2.4}\text{Lu}_{0.6}\text{Ga}_4\text{AlO}_{12}$ | Cr-2p <sub>3/2</sub> (576.4; 580.9)                        | 23   |
| $\text{LiScGeO}_4$                                         | Cr-2p <sub>1/2</sub> (586.7)                               | 22   |

Table S7 lists the binding energy of  $\text{Cr}^{3+}$  of some NIR phosphors. The average binding energy of  $\text{Cr}^{3+}$  was calculated to be 576.53 eV ( $\sigma^2 = 0.1834$ ) (representing the Cr-2p<sub>3/2</sub>). Apparently, the binding energy of  $\text{Cr}^{3+}$  in  $\text{SSA}:0.008\text{Cr}^{3+}$  is close to the average value.

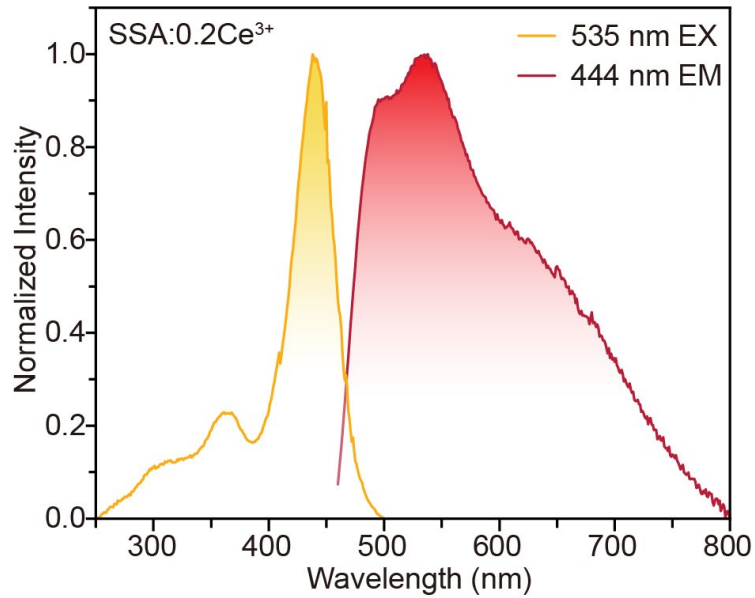

**Fig. S1.** Photoluminescence and photoluminescence excitation spectra of  $\text{SSA}:0.2\text{Ce}^{3+}$ .

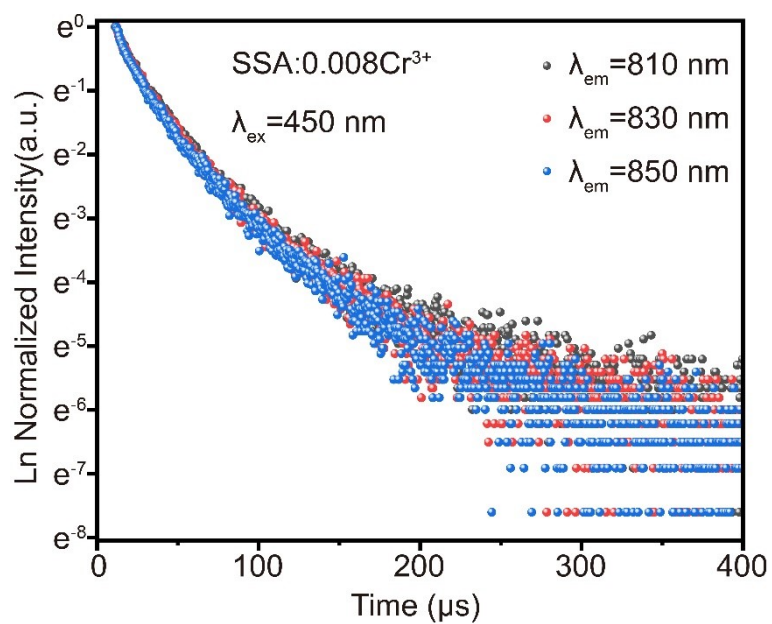

**Fig. S2.** Decay curves of SSA:0.008Cr<sup>3+</sup> monitored at different wavelengths (810 nm, 830 nm and 850 nm, respectively).

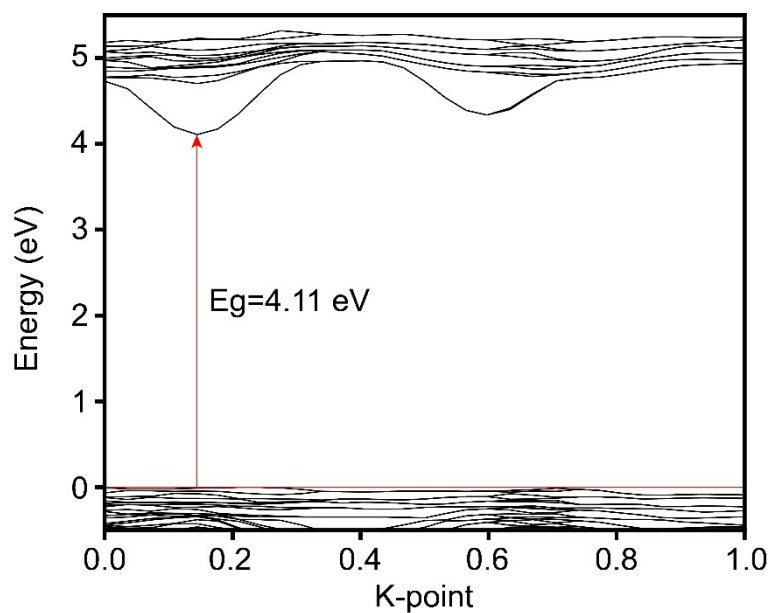

**Fig. S3.** Calculated band structure of Sr<sub>6</sub>Sc<sub>2</sub>Al<sub>4</sub>O<sub>15</sub>.

The calculation was performed via the density functional theory with the generalized gradient-corrected Perdew–Burke–Ernzerhof function. The kinetic energy cutoff and SCF tolerance were 340 eV and 10<sup>-5</sup> eV/atom.

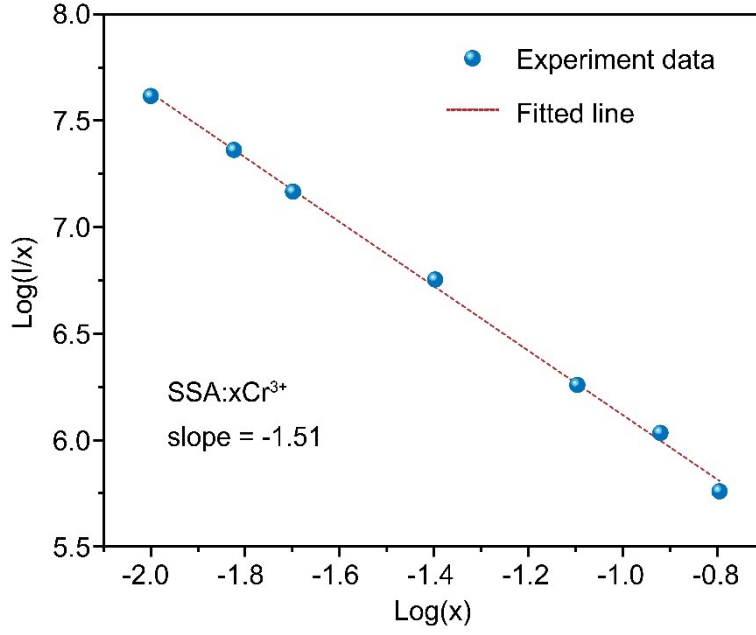

Fig. S4. Relationship between  $\log(I/x)$  and  $\log(x)$  of SSA: $x\text{Cr}^{3+}$  ( $x = 0-0.2$ ).

### Discussion:

The energy transfer and concentration quenching mechanism of phosphors are generally divided into three forms: exchange interaction, radiation recombination and electric multipolar interaction, which can be confirmed by calculating the  $R_c$  (the critical distance between adjacent  $\text{Cr}^{3+}$  ions) from the following formula:<sup>36, 37</sup>

$$R_c = 2 \left( \frac{3V}{4\pi X_c N} \right)^{\frac{1}{3}} \quad (1)$$

Where  $V$  is the unite cell volume,  $N$  is the number of cations which can be occupied by  $\text{Cr}^{3+}$  in each unite cell, and  $X_c$  represents the doped concentration of  $\text{Cr}^{3+}$  ions. For SSA:0.008 $\text{Cr}^{3+}$ ,  $N = 15$ ,  $V = 776.376921 \text{ \AA}^3$ ,  $X_c = 0.004$ , after calculation, the  $R_c$  is 29.13  $\text{\AA}$ , far greater than the maximum distance of exchange interaction (5  $\text{\AA}$ ). So the energy transfer mechanism between  $\text{Cr}^{3+}$  should be the multipolar interaction. In addition, the large  $R_c$  of 29.13  $\text{\AA}$  illustrates that fewer  $\text{Cr}^{3+}$  ions can be accommodated in the limited crystal cell space, leading to a low quenching concentration. And according to the theory of Dexter, the type of interaction can be determined by the following equation:

$$\frac{I}{x} = \frac{k}{1 + \beta(x)^{\frac{\theta}{3}}} \quad (2)$$

Where  $I$  is the emission intensity,  $x$  is the concentration of  $\text{Cr}^{3+}$  beyond the optimal doping

concentration,  $k$  and  $\beta$  are the constants of the same excitation conditions.  $\theta$  represents the characteristic number of electric multipolarity.  $\theta = 6, 8$  and  $10$  represents the dipole-dipole (d-d), dipole-quadrupole (d-q), and quadrupole-quadrupole (q-q) interactions, respectively. In order to obtain the value of  $\theta$ ,  $\log(I/x)$  is plotted on the ordinate and  $\log(x)$  is plotted on the abscissa,  $-\theta/3$  is the slope of the linearly fitting line. Fig. S4 shows that the value of  $-\theta/3$  is  $-1.51$ , so the value of  $\theta$  is  $4.53$  (close to  $6$ ), which indicates that the quenching mechanism of  $\text{Cr}^{3+}$  is dipole-dipole (d-d) interaction in the SSA matrix.

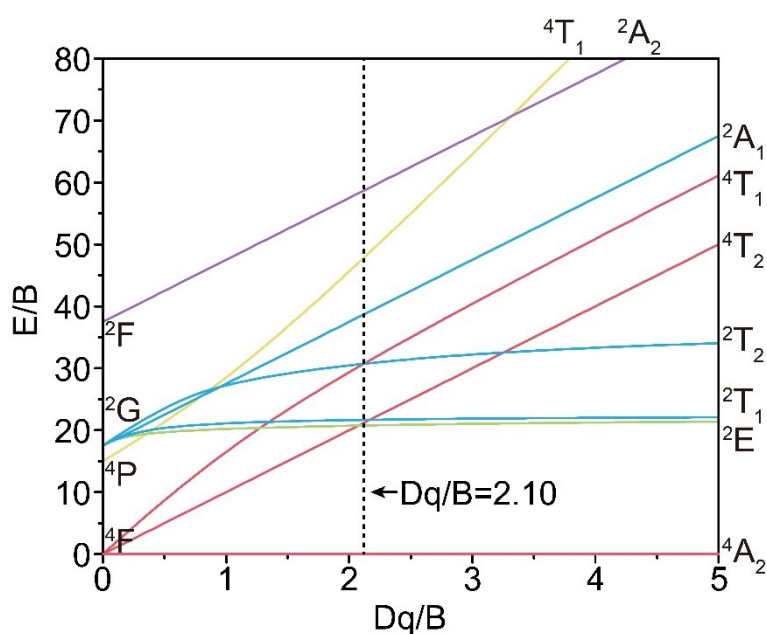

**Fig. S5.** Tanabe-Sugano diagram for the  $d^3$  electronic configuration in an octahedral symmetry

For better understanding the interelectronic transitions that occur in d-orbitals, the Tanabe-Sugano diagram is illustrated in Fig. S5. According to the Tanabe-Sugano diagram, the relative energy position between the  $4T_2$  excited state and the  $4A_2$  ground state is strongly influenced by the crystal field strength ( $Dq/B$ ). When  $\text{Cr}^{3+}$  is in an intermediate crystal field ( $Dq/B \sim 2.3$ ), both  $2E \rightarrow 4A_2$  and  $4T_2 \rightarrow 4A_2$  transitions can be observed in the emission spectra.<sup>38</sup> The value  $Dq/B$  of SSA:0.008 $\text{Cr}^{3+}$ , monitored at 860 nm, is calculated to be 2.10, belonging to the intermediate crystal field.

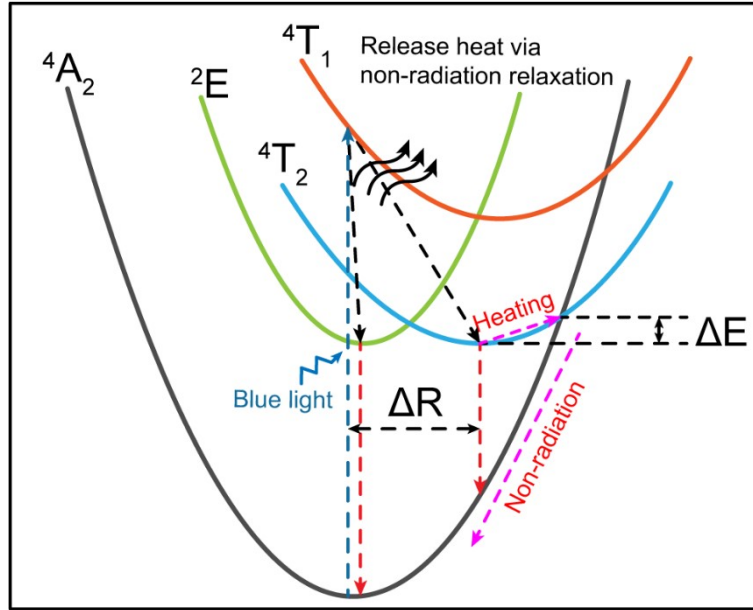

Configurational coordinate diagram

**Fig. S6.** The schematic configuration coordinate diagram of SSA:0.008Cr<sup>3+</sup> in an intermediate crystal field

For the intermediate crystal field, the  ${}^2E$  and  ${}^4T_2$  states are leveled to one another. When Cr<sup>3+</sup> ions were excited by the blue light, the electrons in the  ${}^4A_2$  ground states transition to the  ${}^4T_1$  excited states and relax afterward into the lowest excited state  ${}^2E$  and  ${}^4T_2$  via non-radiative relaxation, then returning to the ground state through  ${}^2E \rightarrow {}^4A_2$  and  ${}^4T_2 \rightarrow {}^4A_2$  transitions. When the temperature is rising, the electrons in the excited state  ${}^4T_2$  will be excited to the intersection of  ${}^4T_2$  and  ${}^4A_2$  energy level, where the required energy  $\Delta E$  is called activation energy. Then the electrons return to the ground state via non-radiative relaxation. The thermal stability depends on the offset ( $\Delta R$ ) between the two parabolas of the ground state and the lowest excited state, which is generally associated with the structural rigidity of host lattice.<sup>39</sup>



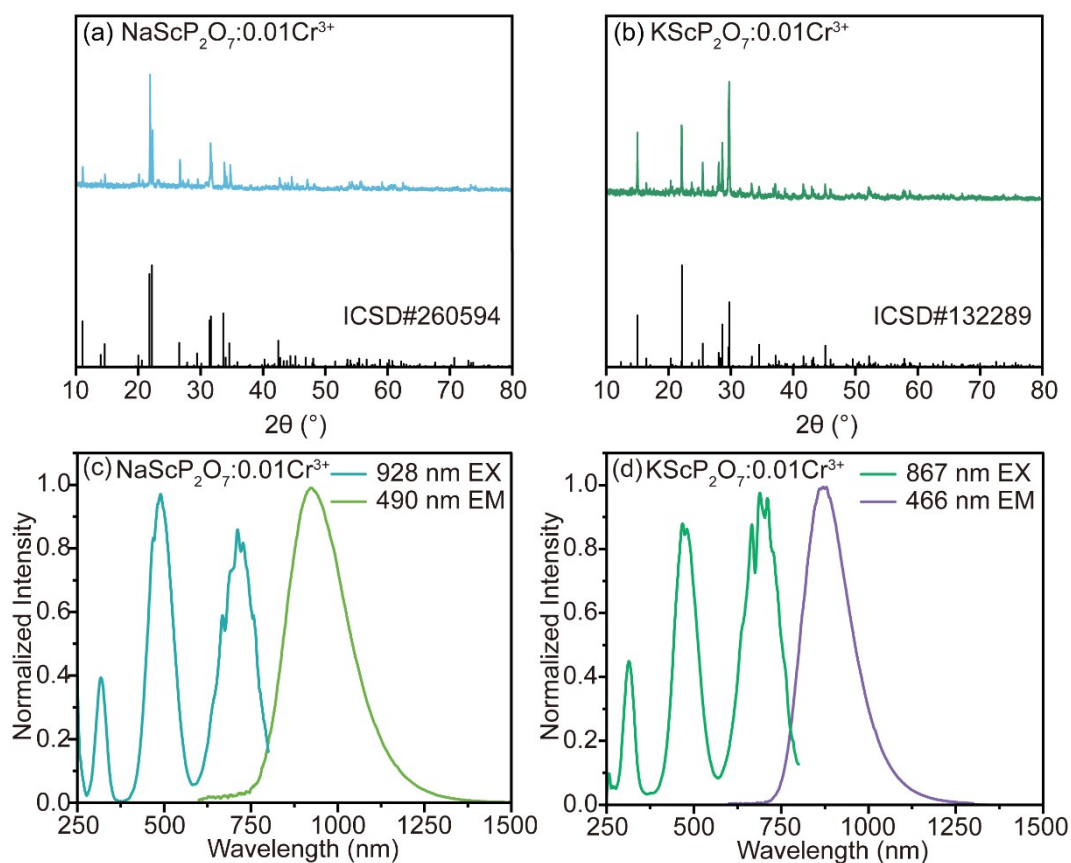

**Fig. S7.** XRD of (a) NaScP<sub>2</sub>O<sub>7</sub>:0.01Cr<sup>3+</sup>; (b) KScP<sub>2</sub>O<sub>7</sub>:0.01Cr<sup>3+</sup>. Photoluminescence and photoluminescence excitation spectra of (c) NaScP<sub>2</sub>O<sub>7</sub>:0.01Cr<sup>3+</sup>; (d) KScP<sub>2</sub>O<sub>7</sub>:0.01Cr<sup>3+</sup>.

NaScP<sub>2</sub>O<sub>7</sub>:0.01Cr<sup>3+</sup> and KScP<sub>2</sub>O<sub>7</sub>:0.01Cr<sup>3+</sup> were synthesized via the conventional high-temperature solid-state reactions using chemical reagents of Na<sub>2</sub>CO<sub>3</sub> (AR, Xi Long Scientific, Shantou, China), K<sub>2</sub>CO<sub>3</sub> (AR, Sinopharm Chemical Reagent, Shanghai, China), Sc<sub>2</sub>O<sub>3</sub> (4N, ZhongNuo Advanced Material Technology, Beijing, China), NH<sub>4</sub>H<sub>2</sub>PO<sub>4</sub> (AR, Sinopharm Chemical Reagent, Shanghai, China) and Cr<sub>2</sub>O<sub>3</sub> (4N, Xi Long Scientific, Shantou, China) as starting materials. The starting materials were finely mixed with alcohol in an agate mortar for 25 mins. Then, the mixtures were loaded into alumina crucibles and fired in a tube furnace at 573 K for 2 h, and then at 1273 K for 6 h under the reducing atmosphere (N<sub>2</sub>: H<sub>2</sub> = 9:1 in volume). As shown in Fig. S7 (a-b), all of the NaScP<sub>2</sub>O<sub>7</sub>:0.01Cr<sup>3+</sup> and KScP<sub>2</sub>O<sub>7</sub>:0.01Cr<sup>3+</sup> peaks match well with the standard ICSD cards (ICSD#260594 and ICSD#132289), and no other impurities are detected, indicating that Cr<sup>3+</sup> doping does not change the structure of the NaScP<sub>2</sub>O<sub>7</sub> and KScP<sub>2</sub>O<sub>7</sub> host. Moreover, as seen in Fig. S7 (c-d), NaScP<sub>2</sub>O<sub>7</sub>:0.01Cr<sup>3+</sup> and KScP<sub>2</sub>O<sub>7</sub>:0.01Cr<sup>3+</sup> show emission peaks of 928 and 867 nm as well as FWHM of 203 and 160 nm, respectively.

## Reference

1. Y. Liang, F. Liu, Y. Chen, X. Wang, K. Sun and Z. Pan, *Dalton Trans.*, 2017, **46**, 11149-11153.
2. J. Qiao, G. Zhou, Y. Zhou, Q. Zhang and Z. Xia, *Nat. Commun.*, 2019, **10**, 5267-5273.
3. S. Li, M. Amachraa, C. Chen, L. Wang, Z. Wang, S. P. Ong and R.-J. Xie, *Matter*, 2022, **5**, 1924-1936.
4. P. R., V. P., S. V. Sravani, V. V., M. I.R., L. V. and J. C.K., *Mater. Res. Bull.*, 2018, **101**, 347-352.
5. S. Zhang, Z. Song, F. Zhao, S. Liu, H. Cai, S. Wang and Q. Liu, *J. Rare Earths*, 2021, **39**, 1484-1491.
6. Z. Xing, P. Li, S. Wu, C. Liu, D. Dai, X. Li, L. Zhang, D. Wang, Z. Yang and Z. Wang, *J. Lumin.*, 2020, **225**, 117352-117364.
7. X. Wang, F. Jahanbazi, J. Wei, C. U. Segre, W. Chen and Y. Mao, *ACS Appl. Mater. Interfaces*, 2022, **14**, 36834-36844.
8. B. Su, M. Li, E. Song and Z. Xia, *Adv. Funct. Mater.*, 2021, **31**, 2105316-2105325.
9. R. Begum, X. Y. Chin, M. Li, B. Damodaran, T. C. Sum, S. Mhaisalkar and N. Mathews, *Chem. Commun.*, 2019, **55**, 5451-5454.
10. H. Ji, X. Hou, M. S. Molokeev, J. Ueda, S. Tanabe, M. G. Brik, Z. Zhang, Y. Wang and D. Chen, *Dalton Trans.*, 2020, **49**, 5711-5721.
11. H. Zhang, J. Zhong, C. Li, L. Wang and W. Zhao, *J. Lumin.*, 2022, **251**, 119211-119218.
12. E. Song, X. Jiang, Y. Zhou, Z. Lin, S. Ye, Z. Xia and Q. Zhang, *Adv. Opt. Mater.*, 2019, **7**, 1901105-1901113.
13. L. Fang, L. Zhang, H. Wu, H. Wu, G. Pan, Z. Hao, F. Liu and J. Zhang, *Inorg. Chem.*, 2022, **61**, 8815-8822.
14. L. Fang, Z. Hao, L. Zhang, H. Wu, H. Wu, G. Pan and J. Zhang, *Mater. Res. Bull.*, 2022, **149**, 111725-111731.
15. C. Yuan, R. Li, Y. Liu, L. Zhang, J. Zhang, G. Leniec, P. Sun, Z. Liu, Z. Luo, R. Dong and J. Jiang, *Laser Photonics Rev.*, 2021, **15**, 2100227-2100234.
16. L. Zeng, J. Zhong, C. Li, Z. Zhuang, L. Chen and W. Zhao, *J. Lumin.*, 2022, **247**, 118909-118915.
17. T. Liu, H. Cai, N. Mao, Z. Song and Q. Liu, *J. Am. Ceram. Soc.*, 2021, **104**, 4577-4584.
18. D. Liu, G. Li, P. Dang, Q. Zhang, Y. Wei, L. Qiu, M. S. Molokeev, H. Lian, M. Shang and J. Lin, *Light: Sci. Appl.*, 2022, **11**, 112-121.
19. X. Zhou, W. Geng, J. Li, Y. Wang, J. Ding and Y. Wang, *Adv. Opt. Mater.*, 2020, **8**, 1902003-1902010.
20. G. Liu, M. S. Molokeev and Z. Xia, *Chem. Mater.*, 2022, **34**, 1376-1384.
21. T. Liu, Z. Liu, J. Wu, K. Zhang, H. An, Z. Hu, S. Deng, X. Li and H. Li, *New J. Chem.*, 2022, **46**, 851-856.
22. Z. Ye, Z. Wang, Q. Wu, X. Huo, H. Yang, Y. Wang, D. Wang, J. Zhao, H. Suo and P. Li, *Dalton Trans.*, 2021, **50**, 10092-10101.
23. X. Zou, X. Wang, H. Zhang, Y. Kang, X. Yang, X. Zhang, M. S. Molokeev and B. Lei, *Chem. Eng. J.*, 2022, **428**, 132003-132011.
24. L. Yao, Q. Shao, M. Shi, T. Shang, Y. Dong, C. Liang, J. He and J. Jiang, *Adv. Opt. Mater.*, 2022, **10**, 2102229-2102238.
25. H. Suo, Y. Wang, X. Zhao, X. Zhang, L. Li, K. Guan, W. Ding, P. Li, Z. Wang and F. Wang, *Laser Photonics Rev.*, 2022, **16**, 2200012-2200019.
26. H. Zeng, T. Zhou, L. Wang and R.-J. Xie, *Chem. Mater.*, 2019, **31**, 5245-5253.

27. D. Huang, H. Zhu, Z. Deng, H. Yang, J. Hu, S. Liang, D. Chen, E. Ma and W. Guo, *J. Mater. Chem. C*, 2021, **9**, 164-172.
28. Y. Li, S. Ye and Q. Zhang, *J. Mater. Chem. C*, 2014, **2**, 4636-4641.
29. S. Miao, Y. Liang, Y. Zhang, D. Chen and X. Wang, *ACS Appl. Mater. Interfaces*, 2021, **13**, 36011-36019.
30. W. Nie, L. Yao, G. Chen, S. Wu, Z. Liao, L. Han and X. Ye, *Dalton Trans.*, 2021, **50**, 8446-8456.
31. J. C. R. Aquino, F. H. Aragón, J. A. H. Coaquira, X. Gratens, V. A. Chitta, I. Gonzales, W. A. A. Macedo and P. C. Morais, *J. Phys. Chem. C*, 2017, **121**, 21670-21677.
32. S. Jiao, R. Pang, S. Wang, H. Wu, T. Tan, S. Zhang, L. Jiang, D. Li, C. Li and H. Zhang, *Mater. Res. Bull.*, 2022, **149**, 111710-111717.
33. J. a. Lai, W. Shen, J. Qiu, D. Zhou, Z. Long, Y. Yang, K. Zhang, I. Khan and Q. Wang, *J. Am. Ceram. Soc.*, 2020, **103**, 5067-5075.
34. G. Wei, P. Li, R. Li, J. Li, Y. Shi, Y. Wang, S. He, Y. Yang, H. Suo and Z. Wang, *Inorg. Chem.*, 2022, **61**, 5665-5671.
35. R. Li, Y. Liu, C. Yuan, G. Leniec, L. Miao, P. Sun, Z. Liu, Z. Luo, R. Dong and J. Jiang, *Adv. Opt. Mater.*, 2021, **9**, 2100388-2100394.
36. C. Tao, Z. Wang, Z. Li, N. Zhang, Z. Yang and P. Li, *J. Alloys Compd.*, 2019, **788**, 1000-1008.
37. G. Blasse, *Phys. Lett. A*, 1968, **28**, 444-445.
38. G. N. A. De Guzman, M. Fang, C. Liang, Z. Bao, S. Hu and R. Liu, *J. Lumin.*, 2020, **219**, 116944-116952.
39. T. Gao, R. Liu, Y. Liu, X. Chen and X. Ma, *J. Lumin.*, 2022, **246**, 118799.
